# Supplementary material for: Wildfire activity enhanced during phases of maximum orbital eccentricity and precessional forcing in the Early Jurassic
Source: Springer Nature journal article supplement (doi:10.1038/s43247-021-00307-3), 2021-11-30
Supplement: 43247_2021_307_MOESM1_ESM.pdf [file 43247_2021_307_MOESM1_ESM.pdf]

## **Description of Additional Supplementary Files**

**File Name:** Supplementary Data 1

**Description:** All raw data used in this MS.
